# Supplementary material
Source: PubMed Central journal article supplement (PMC3027174)
Supplement: supp_tpc.110.080697_3._Supplemental_Data.pdf [file supp_tpc.110.080697_3._Supplemental_Data.pdf]

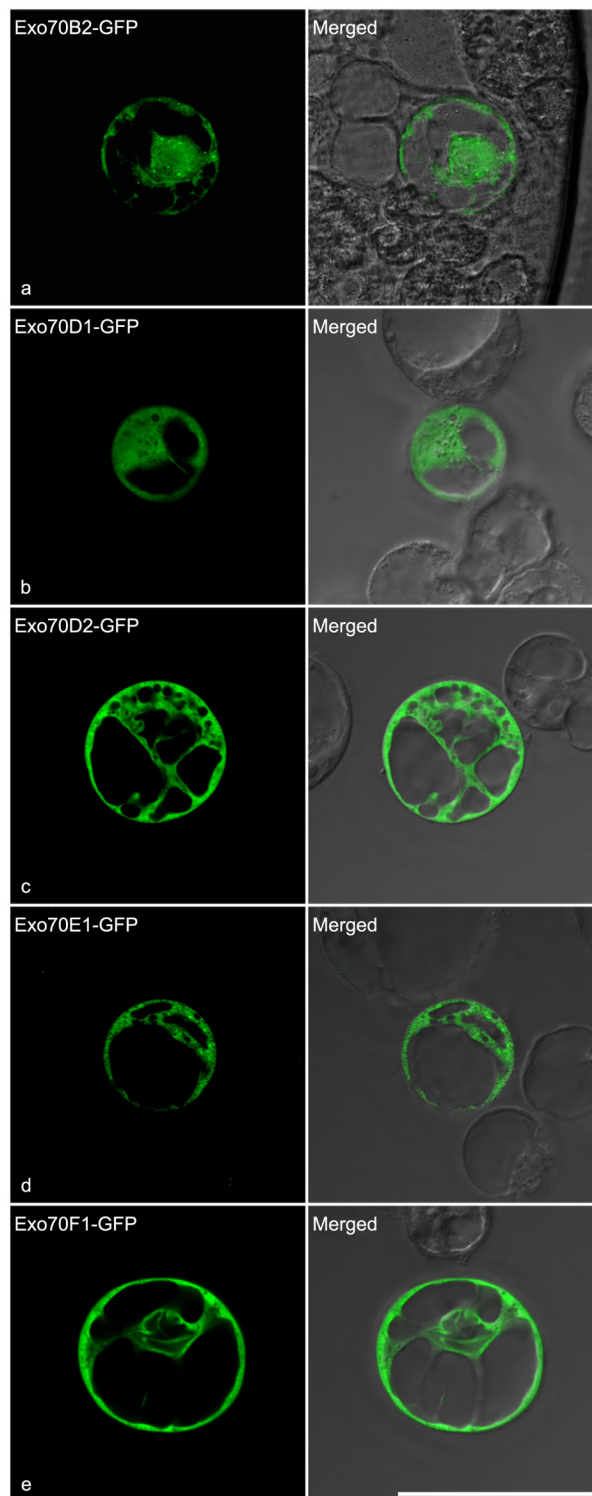

**Supplemental Figure 1. Transient expression of various GFP fusions with selected members of Exo70.**

Various Exo70-GFP fusions were transiently expressed in *Arabidopsis* protoplasts, followed by confocal imaging. The corresponding cells were shown in the merged image. Scale bar = 50  $\mu$ m.

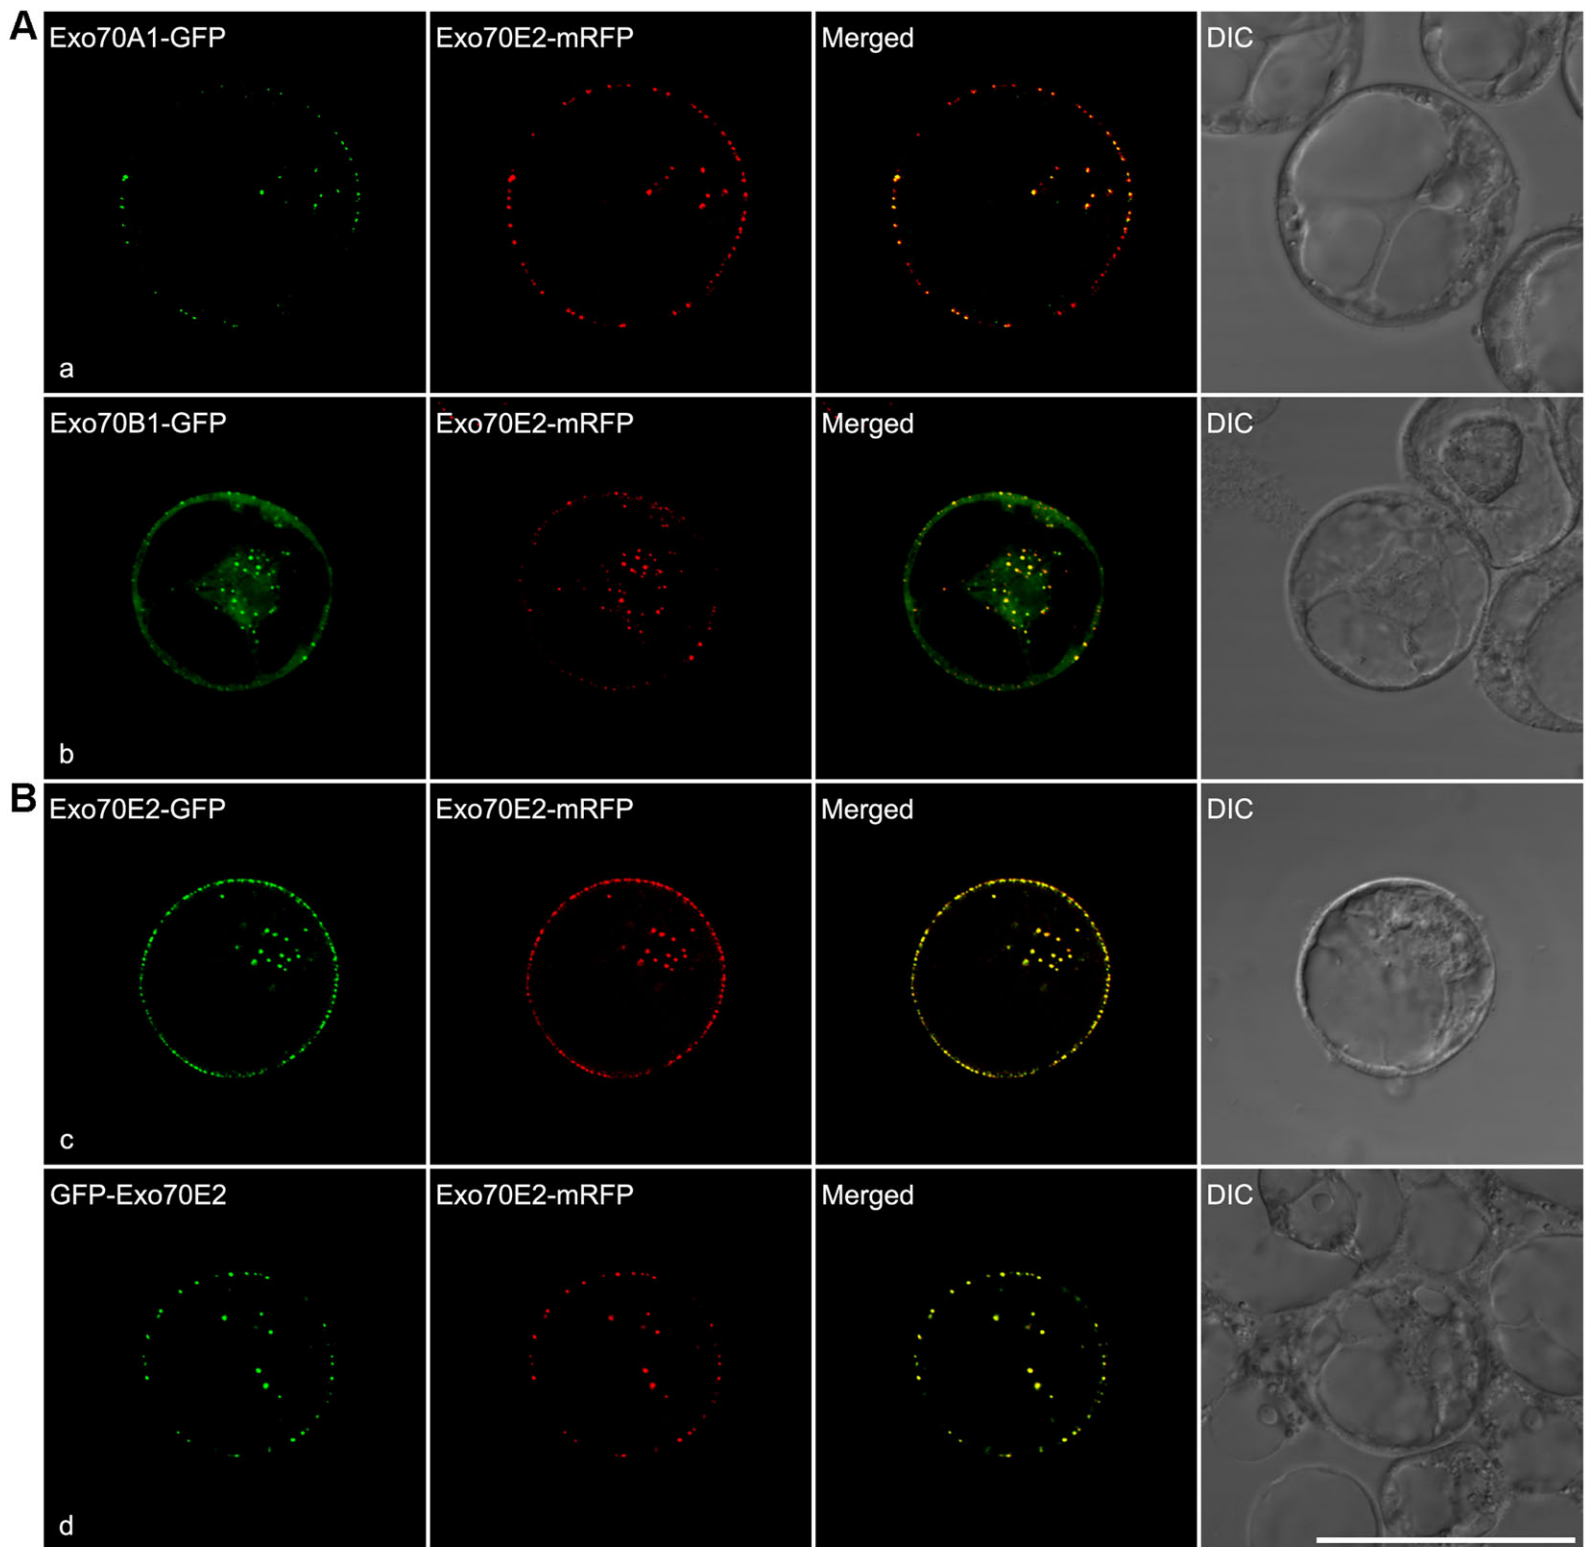

**Supplemental Figure 2. Colocalization of pairs of Exo70-XFP fusions.**

A: Colocalization of Exo70E2-mRFP with Exo70A1-GFP or Exo70B1-GFP in *Arabidopsis* protoplasts.

B: Colocalization of Exo70E2-mRFP with Exo70E2-GFP or GFP-Exo70E2 in *Arabidopsis* protoplasts. Scale bar = 50  $\mu\text{m}$ .

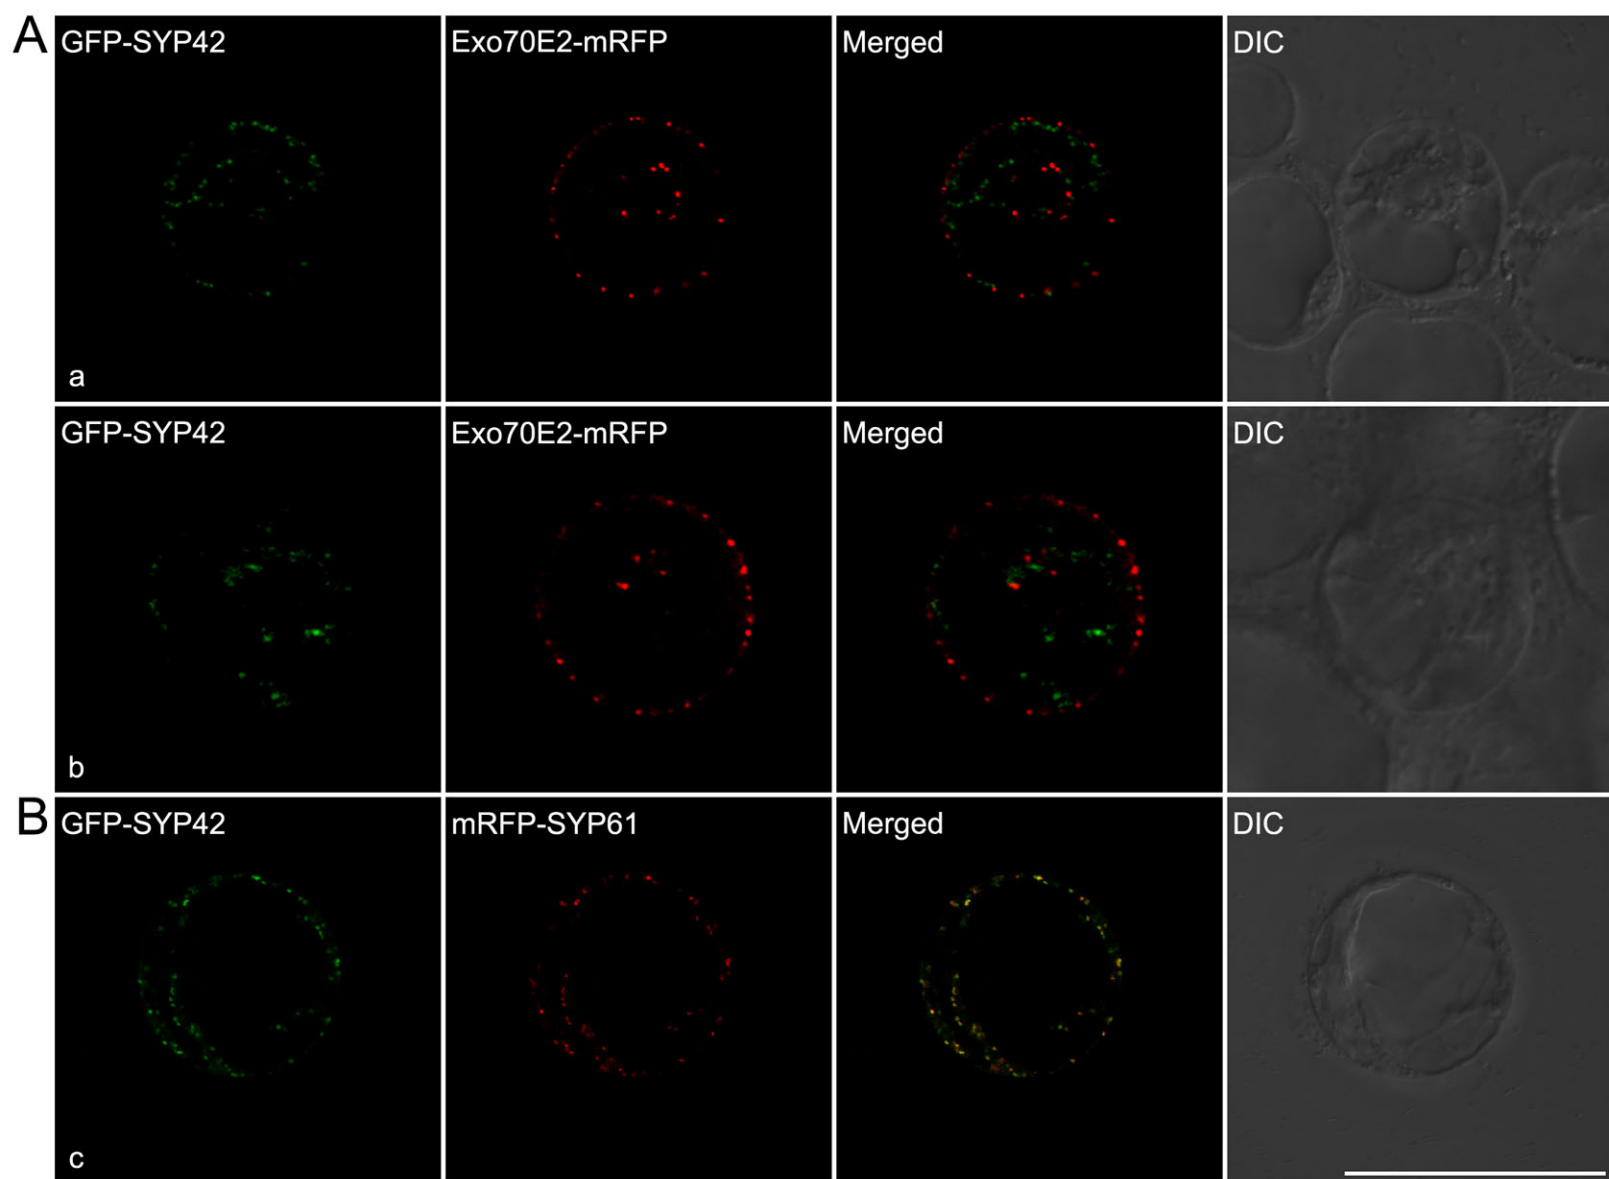

**Supplemental Figure 3. The TGN marker SYP42 is separated from Exo70E2-mRFP in *Arabidopsis* protoplasts.**

A: Separation of GFP-SYP42 from Exo70E2-mRFP in *Arabidopsis* protoplasts (a and b).

B: Colocalization of GFP-SYP42 with mRFP-SYP61 in *Arabidopsis* protoplasts (c). Scale bar = 50  $\mu\text{m}$ .

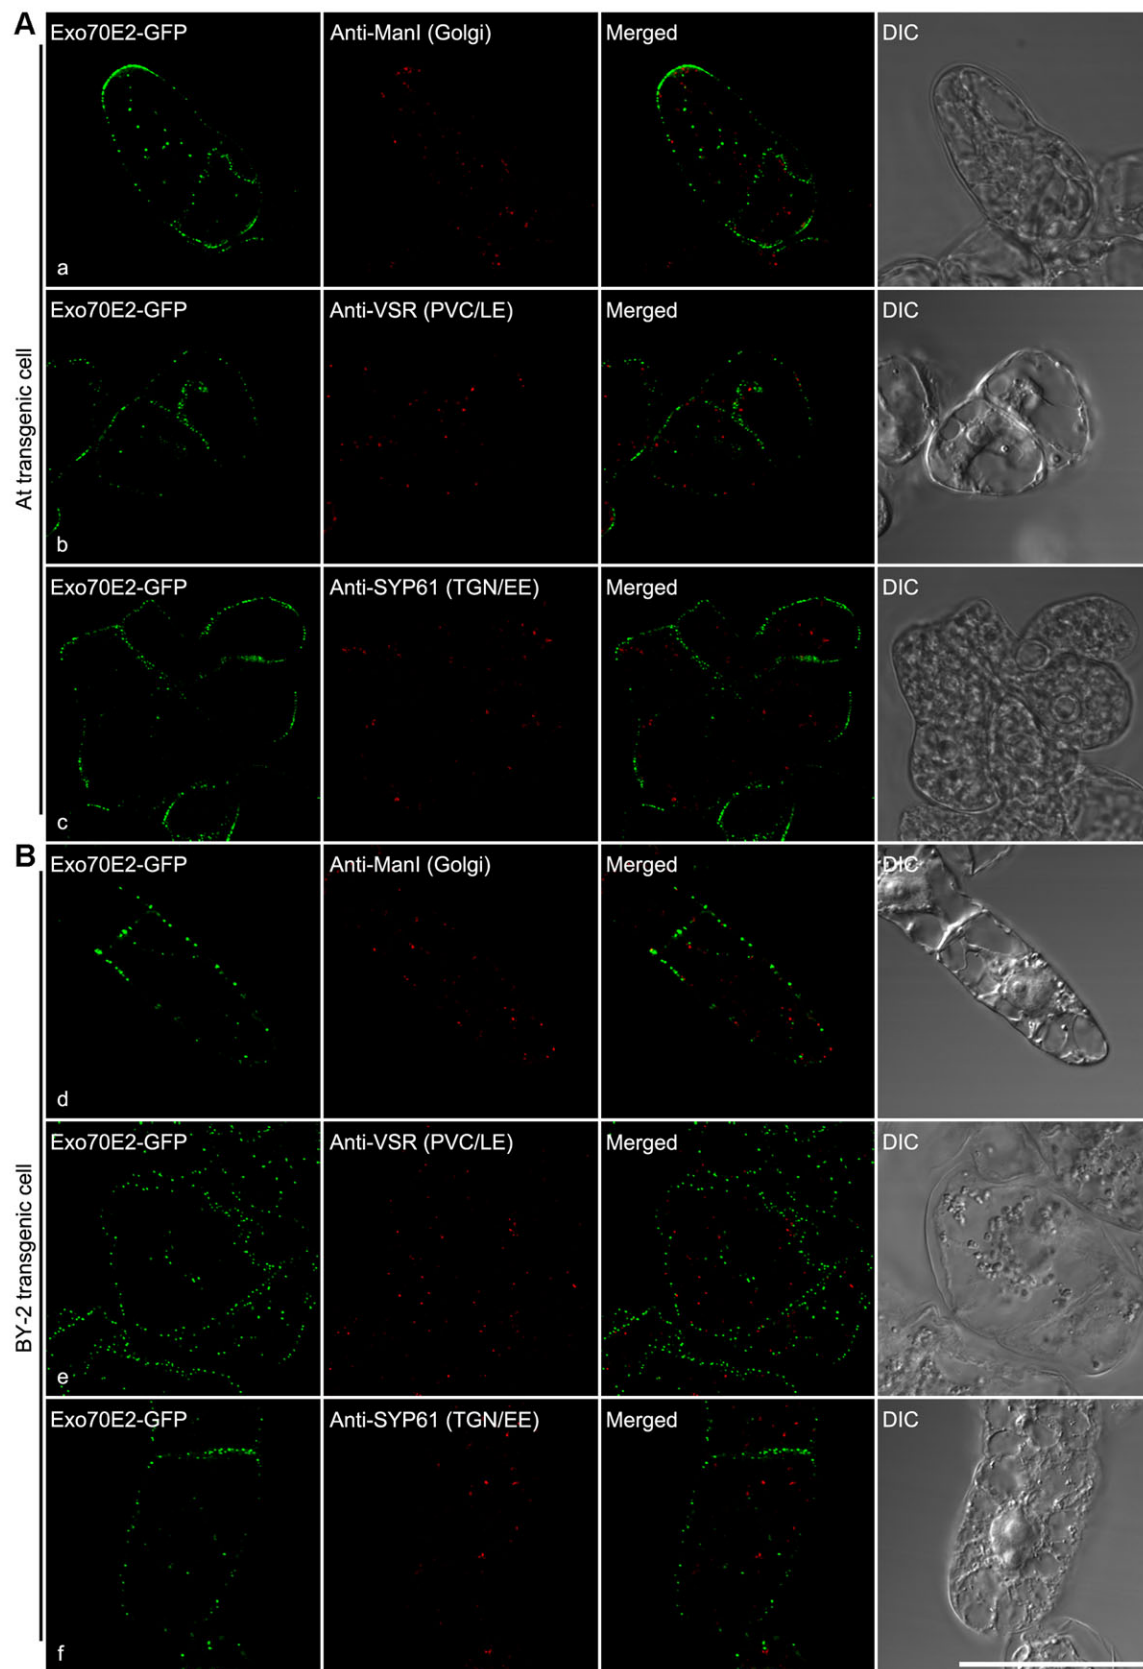

**Supplemental Figure 4. Exo70-GFP-positive organelles are distinct from known secretory compartments.**

Transgenic *Arabidopsis* (A) or tobacco BY-2 (B) cells expressing Exo70E2-GFP fusion proteins were chemically fixed and labeled with antibodies for known organelles as indicated, followed by confocal imaging.

DIC, differential interference contrast; PVC, prevacuolar compartment; LE, late endosome; EE, early endosome; TGN, *trans*-Golgi network. Scale bar = 50  $\mu$ m.

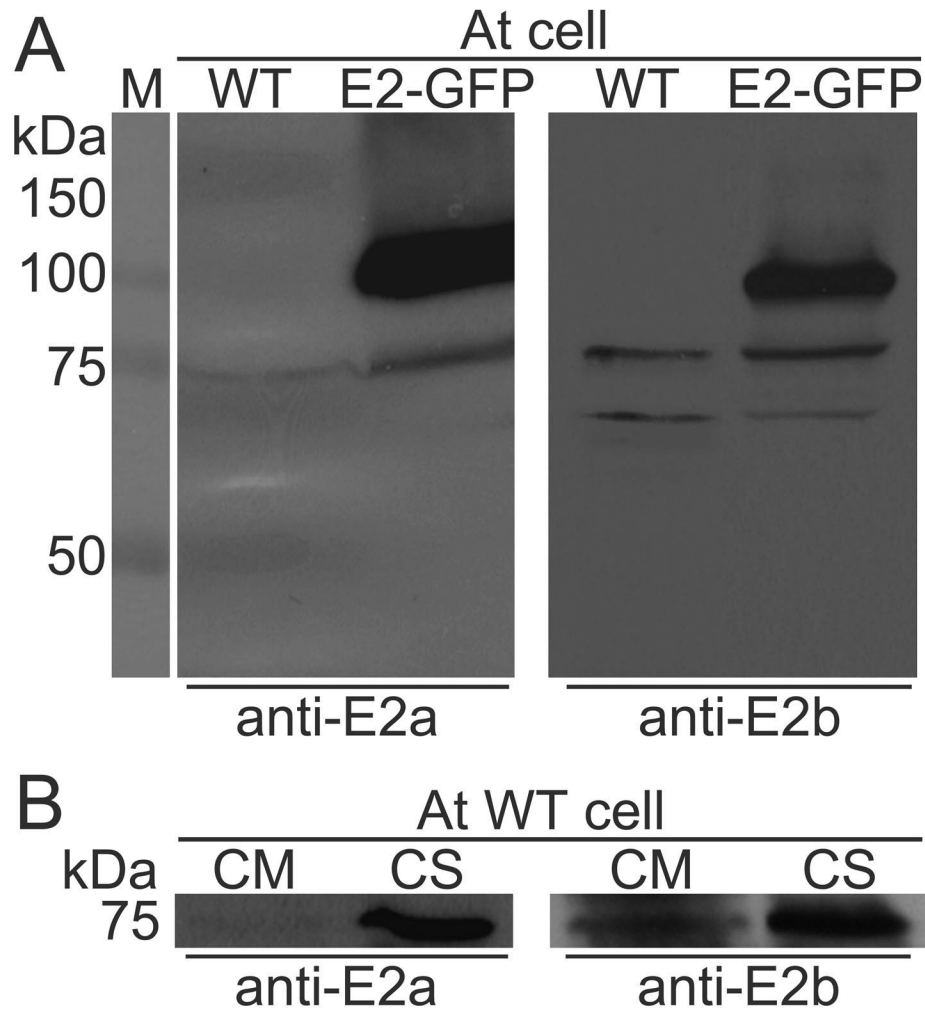

**Supplemental Figure 5. Immunoblot characterization of endogenous Exo70E2 proteins in wild type *Arabidopsis* cells.**

A. Endogenous Exo70E2 proteins are detected by either E2a or E2b antibodies in *Arabidopsis* WT cells and transgenic *Arabidopsis* E2-GFP cells.

B. Endogenous Exo70E2 proteins are detected by either E2a or E2b antibodies in *Arabidopsis* WT cells. CS = cell soluble proteins; CM = cell membrane proteins.

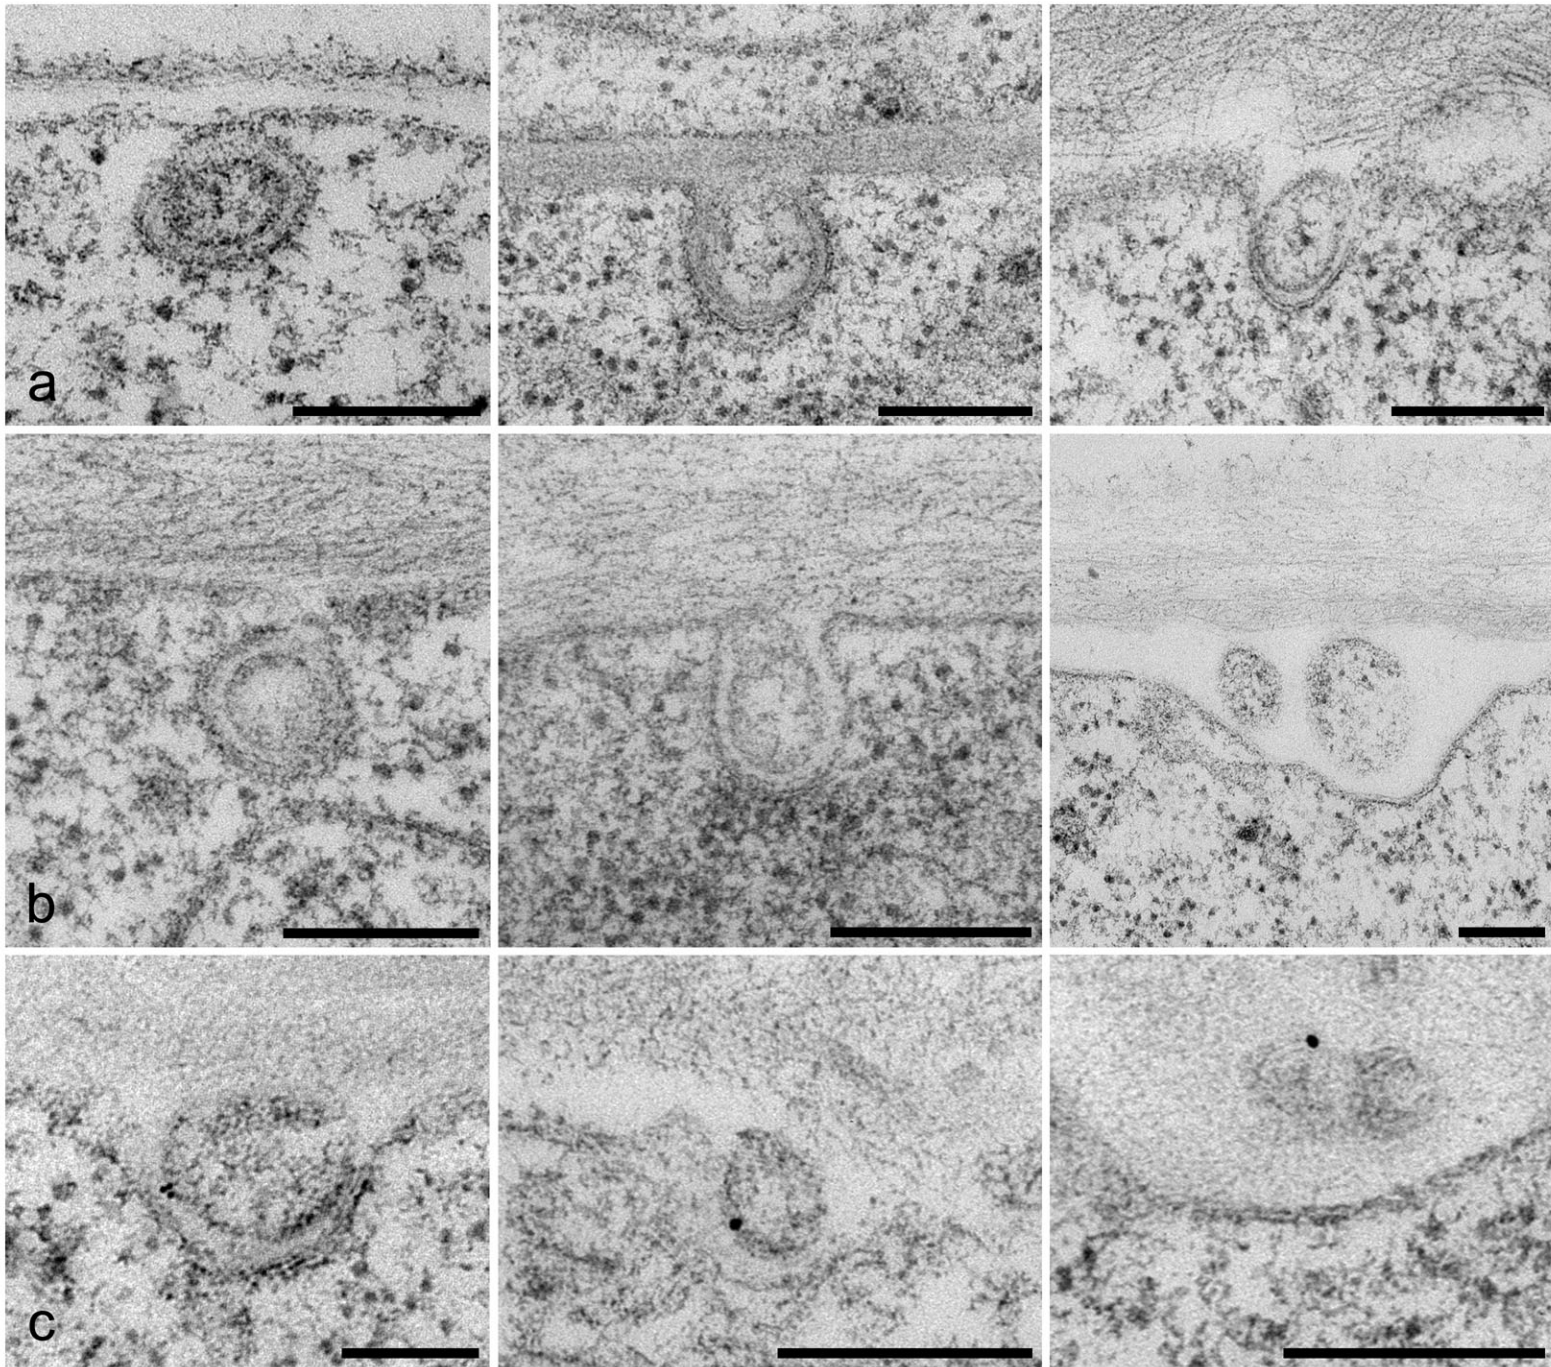

**Supplemental Figure 6. Ultrastructure and fusion nature of EXPO in wild type *Arabidopsis* suspension culture cells.**

Shown are examples of EXPO detected in ultra-thin sections prepared from high-pressure freezing/frozen substituted wild type *Arabidopsis* cells without antibody labeling (a, b) or with anti-E2a labeling (c). Scale bars = 200nm.

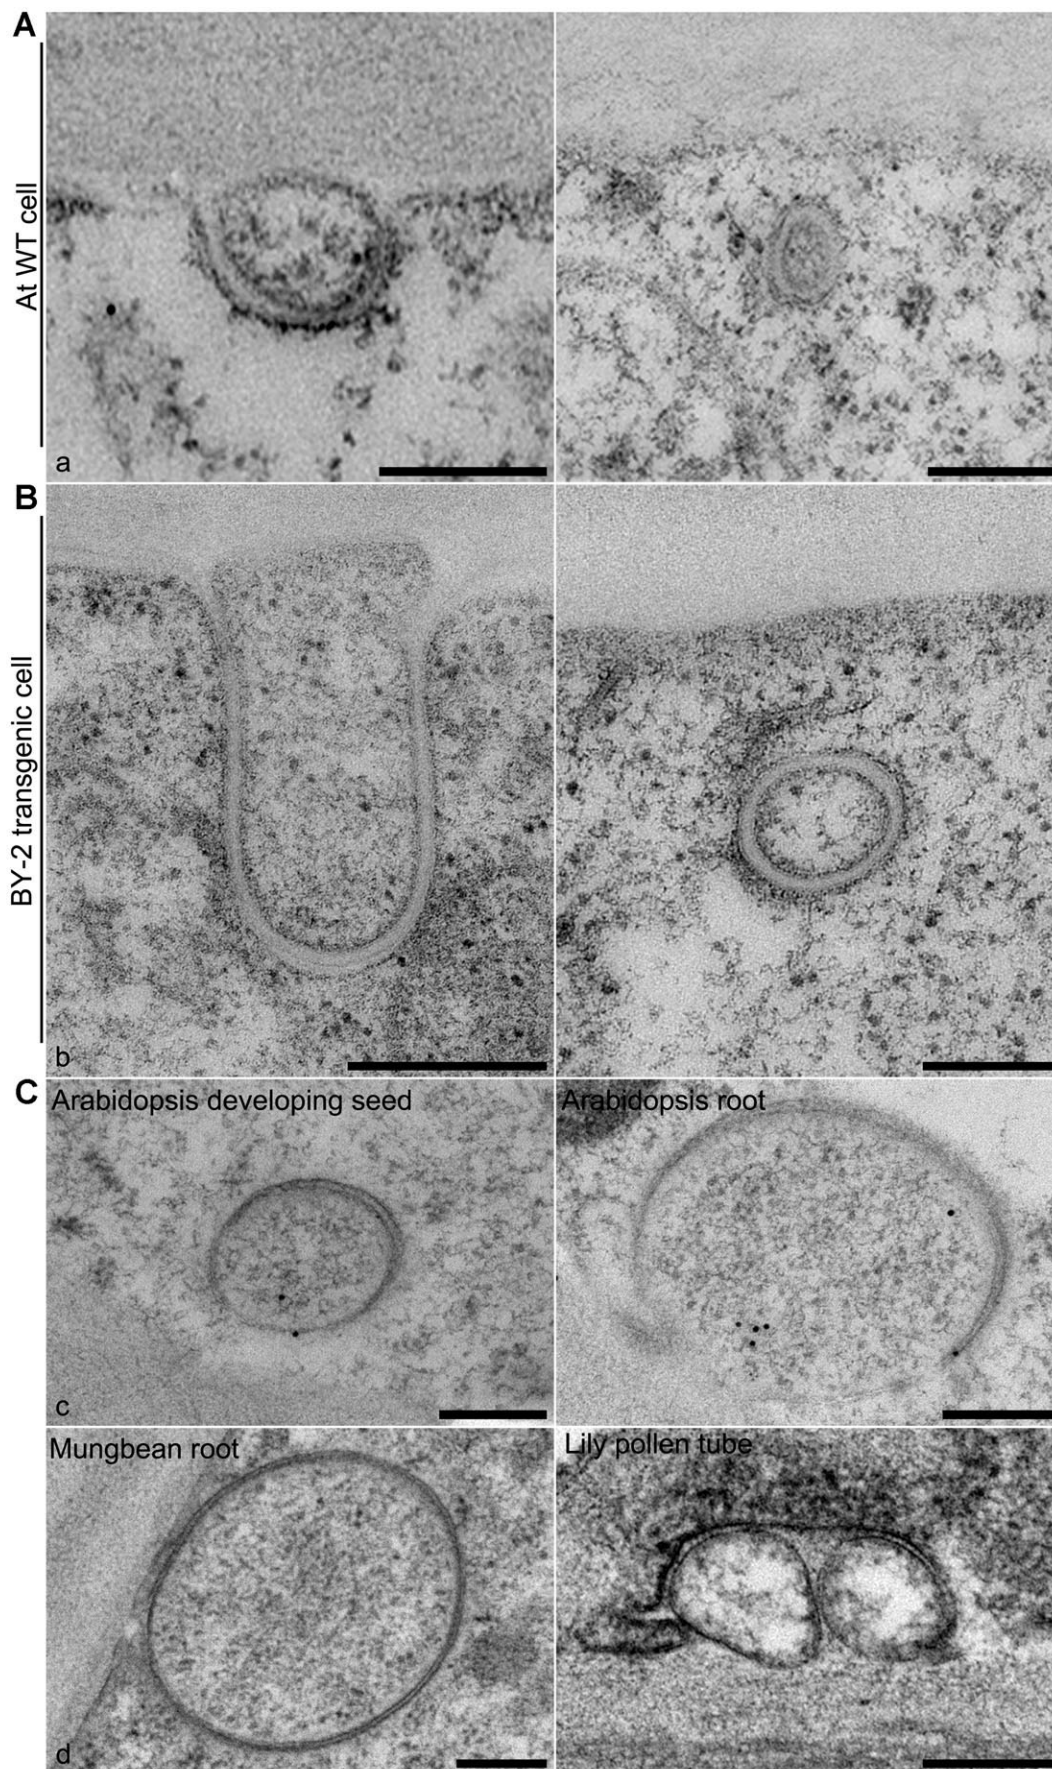

**Supplemental Figure 7. Ultrastructure of EXPO in plant cells.**

Shown are examples of EXPO detected in ultra-thin sections prepared from high-pressure freezing/frozen substituted wild type *Arabidopsis* cells (A), transgenic tobacco BY-2 cells expressing Exo70E2-GFP (B), *Arabidopsis* developing seed and root (C, c), and mungbean root and lily pollen tube (C, d) as indicated. Scale bars = 200nm.

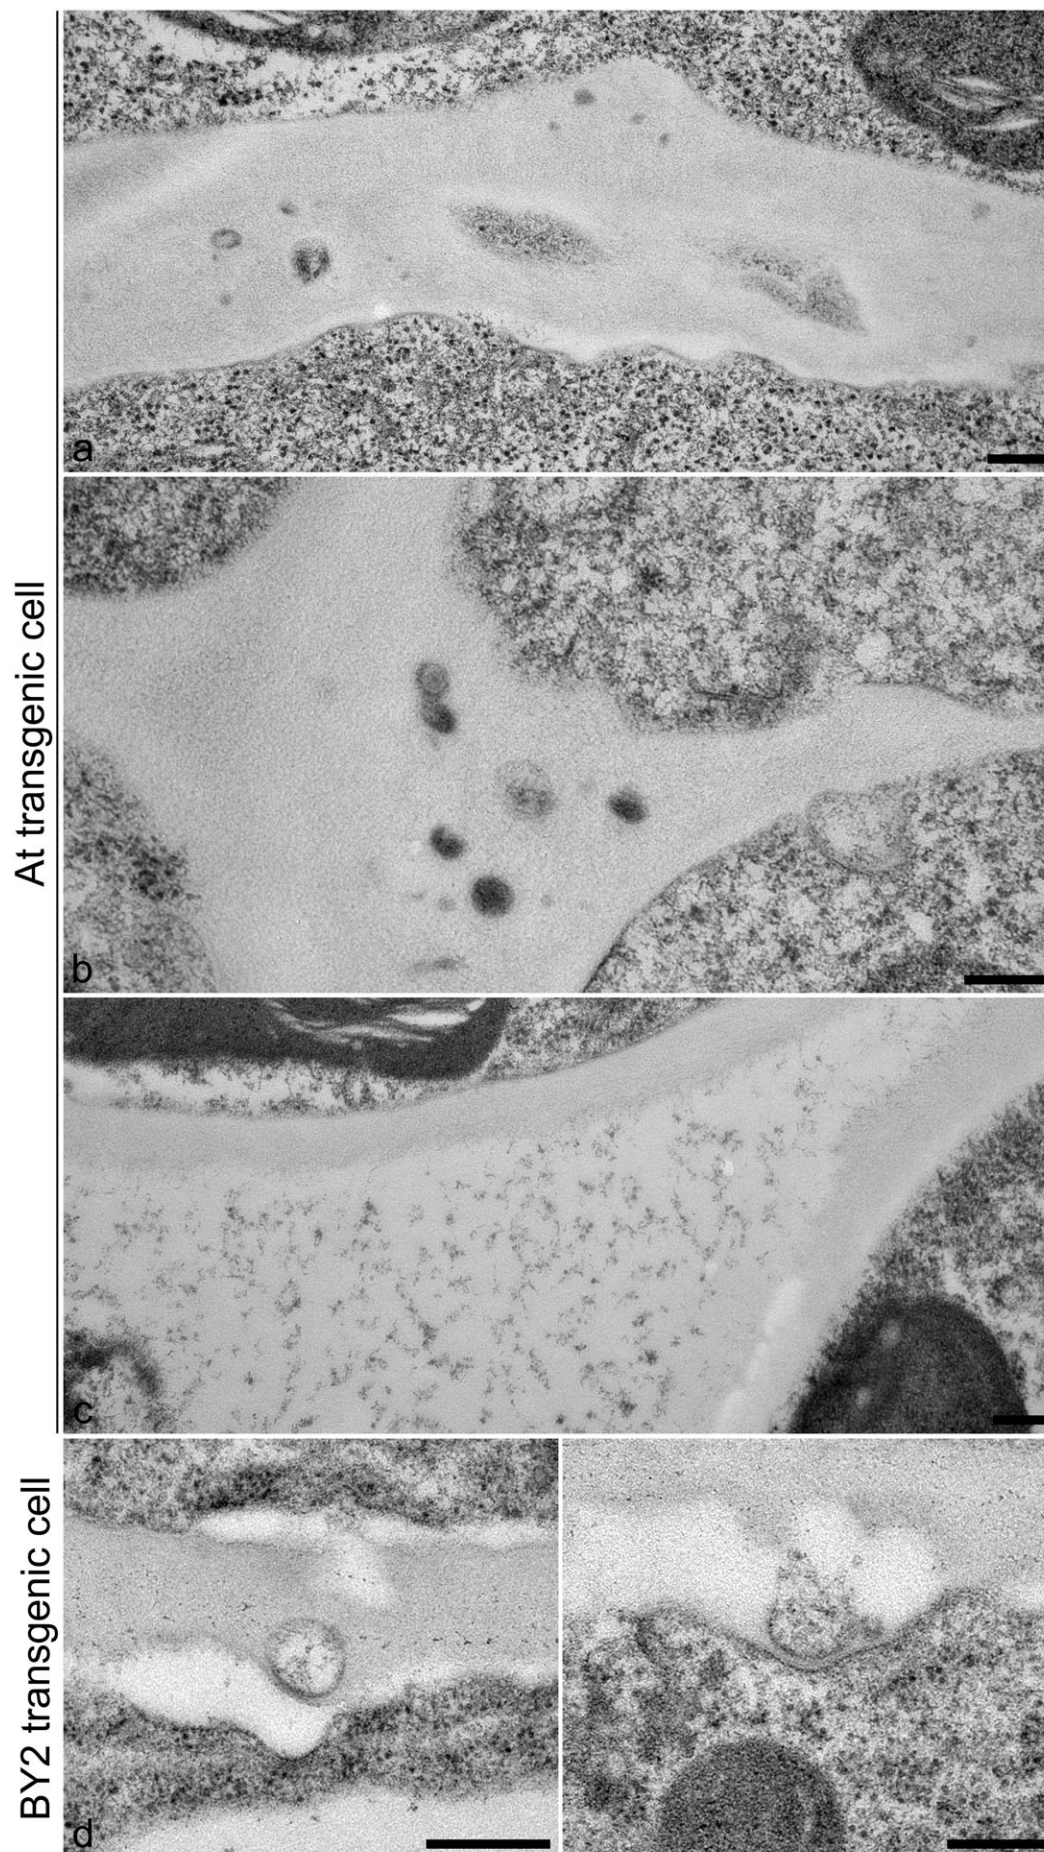

**Supplemental Figure 8. ImmunoEM controls.**

Immunogold labeling of ultra-thin sections cut from high-pressure freezing/frozen substituted samples of *Arabidopsis* transgenic cells and tobacco BY-2 transgenic cells using only gold particle-conjugated secondary antibodies. Scale bars = 200 nm.



Anti-Sec6

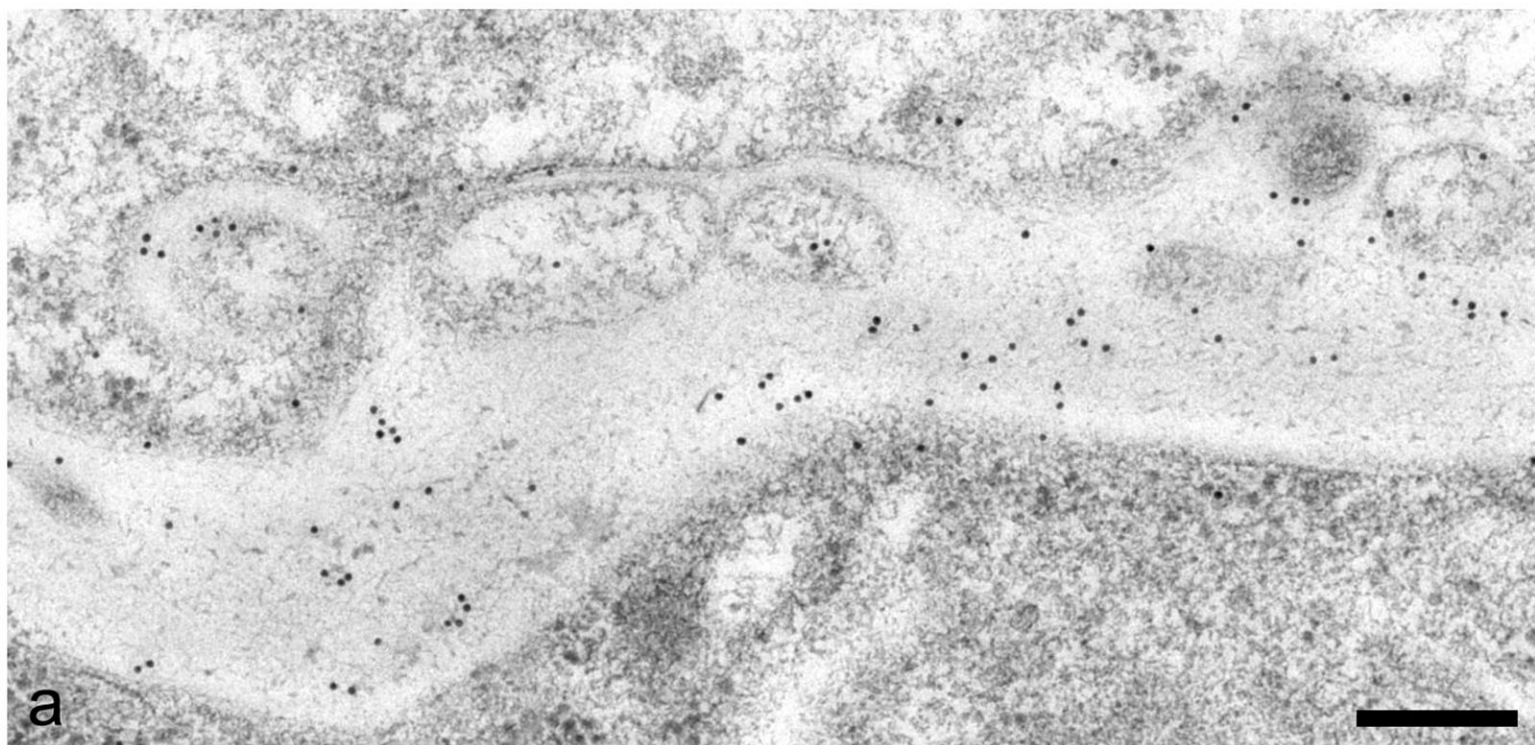

a

Anti-Sec8

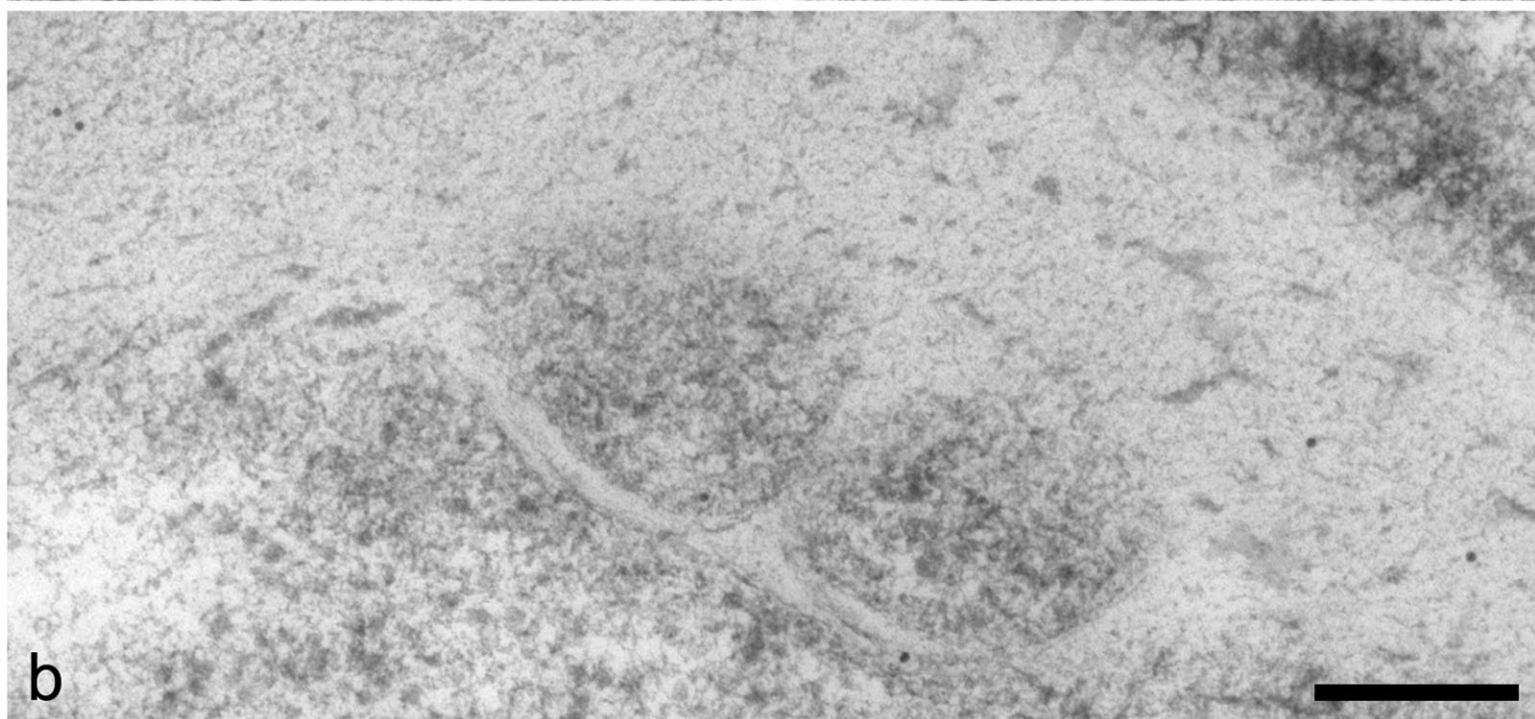

b

**Supplemental Figure 9. EXPOs are also labeled by Sec6 and Sec8 antibodies in *Arabidopsis* cells.**

Immunogold labelling of sections cut from high pressure frozen/freezesubstituted samples of *Arabidopsis* cells using Sec6 and Sec8 antibodies as indicated. Scale bars = 200 nm.

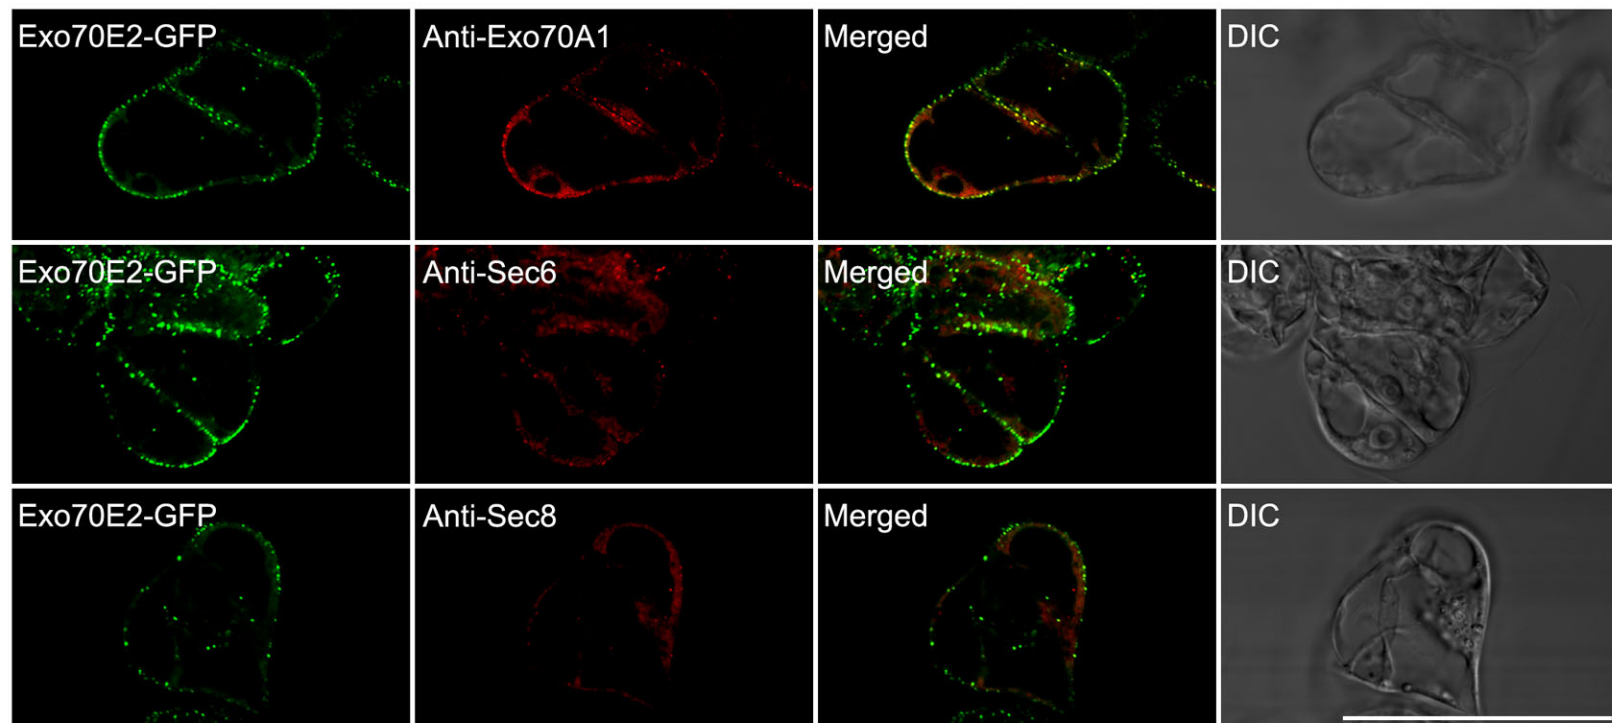

**Supplemental Figure 10. Immunofluorescence of Exo70E2-GFP *Arabidopsis* transgenic cells using different exocyst subunits antibodies.**

Transgenic *Arabidopsis* cells expressing Exo70E2-GFP were chemically fixed and labeled with ExoA1 (a), Sec6 (b) and Sec8 (c) antibodies, followed by confocal imaging.

DIC, differential interference contrast. Scale bar = 50  $\mu\text{m}$ .

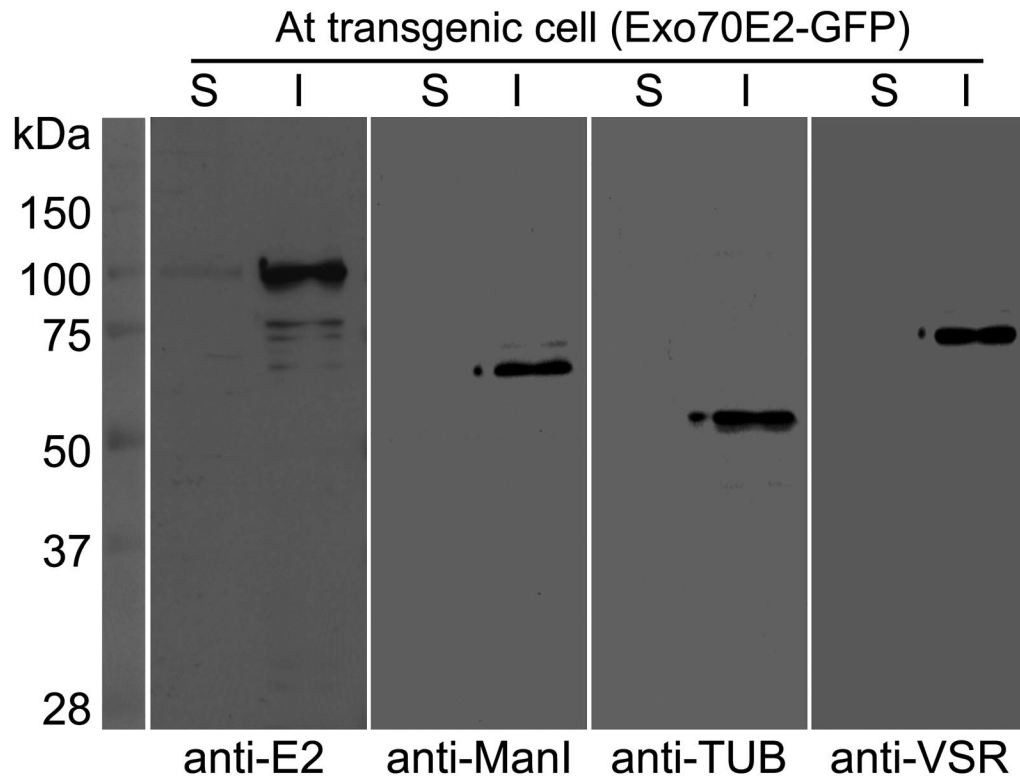

**Supplemental Figure 11. Immunoblot detection of endogenous *Arabidopsis* proteins.**

S and I proteins were prepared from Day-7 transgenic *Arabidopsis* Exo70E2-GFP cells, followed by western blot detection using various antibodies as indicated. S, secretion medium proteins; I, intracellular proteins; TUB, tubulin.

**Supplemental Table 1: Primers used in this study.**

|                            |                                                  |
|----------------------------|--------------------------------------------------|
| Exo70E2-GFP-Forward        | 5'- GGGACTAGTATGGCAGAGTTTGATTCCAAGG -3'          |
| Exo70E2-GFP-Reverse        | 5'- GGGCTCGAGTCTCTTACGAGAGCTGCGCA -3'            |
| GFP-Exo70E2-Forward        | 5'- GGGACTAGTATGGCAGAGTTTGATTCCAAGG -3'          |
| GFP-Exo70E2-Reverse        | 5'- GGGCTCGAGTCATCTCTTACGAGAGCTGCGC -3'          |
| Exo70E2 N-terminus-Forward | 5'- GGGGAATTC ATGGCAGAGTTTGATTCCAAGGTTTC -3'     |
| Exo70E2 N-terminus-Reverse | 5'- GGGCTCGAG TCAGTCTCCCAAATCTGATCACAT-3'        |
| Exo70E2 C-terminus-Forward | 5'- GGGGAATTC TTTGAGTCAATTTCTACAGCTTGCTT-3'      |
| Exo70E2 C-terminus-Reverse | 5'- GGGCTCGAG TCATCTCTTACGAGAGCTGCGC-3'          |
| Exo70A1-Forward            | 5'- GGGACTAGTATGGCTGTTGATAGCAGAATGGATC -3'       |
| Exo70A1-Reverse            | 5'- GGGGGTACCCCGGCGTGGTTCATTCATAGACTTTC -3'      |
| Exo70B1-Forward            | 5'- GGGCCCGGGATGGCGGAGAATGGTGAAGAGAAG -3'        |
| Exo70B1-Reverse            | 5'- GGGACTAGTTTTTCTTCCCGTGGTAGTCCCTTTG -3'       |
| Exo70B2-Forward            | 5'- GGGACTAGTATGGCTGAAGCCGGTGACGAGAATC -3'       |
| Exo70B2-Reverse            | 5'- GGGGGTACCACTTGAGCTTTCCTTGAACAACCG -3'        |
| Exo70D1-Forward            | 5'- GGGACTAGTATGGAACACATGACCAAACCTCAC -3'        |
| Exo70D1-Reverse            | 5'- GGGGGTACCCTCGGATCGTCTTCTCAGATGCTG -3'        |
| Exo70D2-Forward            | 5'- GGGACTAGTATGGCAACACCGGAGACTCGTGG -3'         |
| Exo70D2-Reverse            | 5'- GGGGGTACCCTGAGACCGTCTCAAATGTGGGG             |
| Exo70E1-Forward            | 5'- GGGTCTAGAATGGGAGAGTTTGAGGTAGATGG -3'         |
| Exo70E1-Reverse            | 5'- GGGGGTACCTCTTCTATAAGAATTGTTCAAGG -3'         |
| Exo70F1-Forward            | 5'- GGGTCTAGAATGGCCGCAACAACAACCACGGCGGCGAGTA -3' |
| Exo70F1-Reverse            | 5'- GGGGGTACCACTTTTCCTTCTCGGGTGGTGAAT -3'        |
| SAMS2-Forward              | 5'- GGGTCTAGAATGGAGACTTTCCTATTACATCTG -3'        |
| SAMS2-Reverse              | 5'- GGGCTCGAGAGCTTGAGGTTTGTCCCACTT -3'           |
